# Supplementary material
Source: HighWire-hosted journal article supplement (https://bmjopen.bmj.com/content/8/12/e023676)
Supplement: inline-supplementary-material-2 [file inline-supplementary-material-2.pdf]

## Appendix B: Participant Information

### Staff

| Site   | Staff Name (pseudonym) | Role and band                                                   |
|--------|------------------------|-----------------------------------------------------------------|
| Site A | Nathalie               | OT B5                                                           |
|        | Agata                  | OT B6                                                           |
|        | Alexia                 | OT B7                                                           |
|        | Tom                    | PT B5                                                           |
|        | Joanne                 | PT B6                                                           |
|        | Jackie                 | PT B7                                                           |
|        | Heidi                  | SLT B5                                                          |
|        | Claire                 | SLT B7                                                          |
|        | Tina                   | TA                                                              |
|        | Dr Julie Hiller        | Stroke Consultant                                               |
|        | Ann                    | Therapy Manager (overseeing all therapies throughout the trust) |
| Site B | Laura                  | OT B6                                                           |
|        | Cheryl                 | OT B6                                                           |
|        | Katie                  | PT B5                                                           |
|        | Susie                  | PT B6                                                           |
|        | Helen                  | PT B7                                                           |
|        | Lucy                   | Clinical Lead (B8 PT)                                           |
|        | Sinead                 | SLT B5                                                          |
|        | Sandy                  | SLT B6                                                          |
|        | Judy                   | SLT B7                                                          |
|        | Pip                    | TA                                                              |
|        | Linda                  | Stroke Nurse Specialist                                         |
|        | Dr Stephen Adams       | Stroke Consultant                                               |
| Site C | Ken                    | OT B5                                                           |
|        | Nancy                  | OT B7                                                           |
|        | Rona                   | Clinical Lead (B8 OT)                                           |
|        | Ghita                  | PT B6                                                           |
|        | Joanne                 | PT B7                                                           |
|        | Mary                   | SLT B5                                                          |
|        | Catherine              | SLT B6                                                          |
|        | Becky                  | TA                                                              |
|        | Diedre                 | Therapy Manager                                                 |
|        | Michael                | Consultant                                                      |

## Patients / Carer

| Site   | Patient name (pseudonym)                 | Age | Time since stroke and functional level                                                                                                                                                                                                 | Social situation / discharge plans                                                                                                                                                                                                   |
|--------|------------------------------------------|-----|----------------------------------------------------------------------------------------------------------------------------------------------------------------------------------------------------------------------------------------|--------------------------------------------------------------------------------------------------------------------------------------------------------------------------------------------------------------------------------------|
| Site A | Eddie                                    | 72  | 3 months post stroke.<br>No movement on right side. Dependent on wheelchair and needing assistance to use it.                                                                                                                          | 'Unbefriended' and previously unemployed. No next of kin. Previous accommodation no longer suitable as not wheelchair accessible. Discharge delayed due to need to re-house with appropriate support.                                |
|        | Simon (wife, Mrs Rosenfeld, interviewed) | 79  | 1 month post stroke.<br>Dependent on a hoist to move between bed and specialist chair. Increasingly unwell – cause unknown.                                                                                                            | Previously had a respected role in community, living with wife and family. As condition deteriorated, family and team planned for him to be discharged to a nursing home when medically stable.                                      |
|        | Yemi                                     | 58  | 2 months post stroke.<br>Left sided weakness. Doubly incontinent and using a hoist to move from bed to wheelchair. Progressing in therapy and managing to stand with support.                                                          | Mother of young adult children, employed as a mental health care assistant. On waiting list to be transferred to neuro-rehab unit.                                                                                                   |
|        | Rafael                                   | 48  | 2 months post stroke.<br>Made significant progress – at time of interview was able to walk with a stick and making progress with speech and use of right hand.                                                                         | Was renting a room in a house share, now considered unsuitable due to stairs. Following a lengthy hospital stay, transferred to a nursing home to await rehousing.                                                                   |
| Site B | Marcus                                   | 61  | 12 days post stroke. Speech difficulties (expressive dysphasia), arm weakness, able to walk but deemed impulsive and at risk of falls by therapists.                                                                                   | Lives with girlfriend. Discharged home on day of interview with ESD input.                                                                                                                                                           |
|        | Richard                                  | 80  | 11 days post stroke. Speech difficulties (dysarthria), right sided weakness, inattention to right side.                                                                                                                                | Lives alone. Very active and independent prior to stroke. Plan to discharge home with ESD.                                                                                                                                           |
|        | Cerys                                    | 89  | 13 days post stroke. Left sided weakness. Swallowing difficulties. Needing assistance to move between bed and wheelchair. Practising walking with assistance in therapy. Memory problems, sleep difficulties, anxious and low in mood. | Was living with husband in sheltered accommodation. Planned for one week of further rehabilitation then discharge home, but this was delayed as Cerys became unwell with a chest infection.                                          |
| Site C | Tristan                                  | 60  | 18 days post stroke. Right sided facial and arm weakness. Dysphasia and dysarthria.                                                                                                                                                    | Previously lived alone in own flat in, but unable to return there due to uninhabitable condition of flat. Discharge already delayed by 12 days at time of interview, as distant relatives were taking responsibility for re-housing. |
|        | Imran                                    | 66  | 14 days post stroke. Dense left sided weakness. Able to move between bed and wheelchair using a rotastand and assistance of two.                                                                                                       | Lives with wife.<br>Aiming to go home with support from ESD.                                                                                                                                                                         |
|        | John                                     | 68  | 20 days post stroke.<br>Able to walk with supervision.<br>Incontinent. Cognitive impairment. Apraxia.                                                                                                                                  | Lives with wife who has health problems, children are concerned about him being discharged home. Admission prolonged due to family concerns and poorer community services.                                                           |
